# Supplementary material
Source: MDPI journal article supplement (https://www.mdpi.com/2220-9964/10/11/794)
Supplement: s1 [file s1 › ijgi-924255-supplementary.pdf]

## Appendix

### Supplementary Information

**Table S1. ND-GAIN Indicators Reference Points**

| Sector            | Indicator                                                       | Reference points                                                                                                                                                                                                                     | Baseline Min | Baseline Max |
|-------------------|-----------------------------------------------------------------|--------------------------------------------------------------------------------------------------------------------------------------------------------------------------------------------------------------------------------------|--------------|--------------|
| <b>Food</b>       | Projected change of cereal yields                               | 3.56 <sub>1</sub>                                                                                                                                                                                                                    | -0.389       | 3.563        |
|                   | Projected population change                                     | -20% <sub>1</sub>                                                                                                                                                                                                                    | -0.20272     | 0.8355       |
|                   | Food import dependency                                          | 0% <sub>2</sub>                                                                                                                                                                                                                      | 0            | 1.037        |
|                   | Rural population                                                | 0% <sub>2</sub>                                                                                                                                                                                                                      | 0            | 92.789       |
|                   | Agriculture capacity                                            | Area equipped for irrigation: 28% <sub>1</sub><br>Fertilizer use: 200 tonnes/1000 Ha <sub>1</sub><br>Pesticide use: 10 tonnes of active ingredients/1000 Ha <sub>1</sub><br>Tractor use: 1100/100 sq. km of arable land <sub>1</sub> | 0            | 1            |
|                   | Child malnutrition                                              | 0% <sub>2</sub>                                                                                                                                                                                                                      | 0            | 15           |
| <b>Water</b>      | Projected change of annual runoff                               | 100% <sub>1</sub>                                                                                                                                                                                                                    | 0            | 1            |
|                   | Projected change of annual groundwater recharge                 | 100% <sub>1</sub>                                                                                                                                                                                                                    | 0            | 1            |
|                   | Fresh water withdrawal rate                                     | 0% <sub>2</sub>                                                                                                                                                                                                                      | 0            | 100          |
|                   | Water dependency ratio                                          | 0% <sub>2</sub>                                                                                                                                                                                                                      | 0            | 73.32        |
|                   | Dam capacity                                                    | 4932 m <sup>3</sup> per capita <sub>1</sub>                                                                                                                                                                                          | 0            | 4932         |
|                   | Access to reliable drinking water                               | 100% <sub>2</sub>                                                                                                                                                                                                                    | 54.99        | 100          |
| <b>Health</b>     | Projected change of deaths from climate change induced diseases | 1.03 <sub>2</sub>                                                                                                                                                                                                                    | 1.025        | 1.19         |
|                   | Projected change in vector borne diseases                       | -8.1 months <sub>1</sub>                                                                                                                                                                                                             | -8.16        | 64.86        |
|                   | Dependency on external resource for health services             | 0% <sub>2</sub>                                                                                                                                                                                                                      | 0            | 29.42        |
|                   | Slum population                                                 | 0% <sub>2</sub>                                                                                                                                                                                                                      | 0            | 97           |
|                   | Medical staff                                                   | 12.3% <sub>01</sub>                                                                                                                                                                                                                  | 0            | 12.32        |
|                   | Access to improved sanitation facilities                        | 100% <sub>2</sub>                                                                                                                                                                                                                    | 19           | 99.5         |
| <b>Ecosystems</b> | Projected change of biome distribution                          | 11% <sub>1</sub>                                                                                                                                                                                                                     | 0.11         | 0.96         |

|                       |                                                       |                                 |         |               |
|-----------------------|-------------------------------------------------------|---------------------------------|---------|---------------|
|                       | Projected change of marine biodiversity               | 0 <sub>1</sub>                  | 0       | 0.88          |
|                       | Natural capital dependency                            | 0 <sub>2</sub>                  | 0       | 0.46          |
|                       | Ecological footprint                                  | 0.35 Ha per capita <sub>1</sub> | 0.35    | 4.84          |
|                       | Protected biome                                       | 100 <sub>3</sub>                | 0       | 100           |
|                       | Engagement in international environmental conventions | 1 <sub>2</sub>                  | 0       | 1             |
| <b>Human Habitat</b>  | Projected change of warm periods                      | 30% <sub>1</sub>                | 29.99   | 113.31        |
|                       | Projected change of flood hazard                      | -4% <sub>1</sub>                | -0.0395 | 0.1613<br>9 5 |
|                       | Urban concentration                                   | 0.0053 <sub>1</sub>             | 0.00534 | 1             |
|                       | Age dependency ratio                                  | 28% <sub>1</sub>                | 0.28    | 0.5334        |
|                       | Quality of trade and transport infrastructure         | 5 <sub>3</sub>                  | 1       | 5             |
|                       | Paved roads                                           | 100% <sub>2</sub>               | 0.8     | 100           |
| <b>Infrastructure</b> | Projected change of hydropower generation capacity    | 141% <sub>1</sub>               | -1.82   | 1.411         |
|                       | Projected change of sea level rise impacts            | 0% <sub>1</sub>                 | 0       | 0.113         |
|                       | Dependency on imported energy                         | 0% <sub>2</sub>                 | 0       | 99.93         |
|                       | Population living under 5m above sea level            | 0% <sub>1</sub>                 | 0       | 24.11         |
|                       | Electricity access                                    | 100% <sub>2</sub>               | 18.62   | 100           |
|                       | Disaster preparedness                                 | 4.7 <sub>1</sub>                | 1.0455  | 4.684         |

Note: The reference points set by the data sources are:

Protected biome: 100 (Hsu et al., 2014)

Quality of trade and transport infrastructure (Logistic Performance Index): 5 (Arvis et al., 2012)

Doing business: 0.99 (IBRD/WB, 2013)

Governance readiness measures: 2.5 for all four measures (Kaufmann et al., 2010).

ICT infrastructure measures: 2013 ICT Development Index (ITU, 2013)

Reference: Chen, C., Noble, I., Hellmann, J., Coffee, J., Murillo, M., Chawla, N. University of Notre Dame Global Adaptation Index, Country index technical report, 2015. 46 p., Available online: <http://index.gain.org/about/reference> (accessed on 11 February 2018).
